# Supplementary material for: The E3 ubiquitin ligase MARCH1 regulates glucose-tolerance and lipid storage in a sex-specific manner
Source: PubMed Central journal article supplement (PMC6200199; doi:10.1371/journal.pone.0204898), 2018-10-24

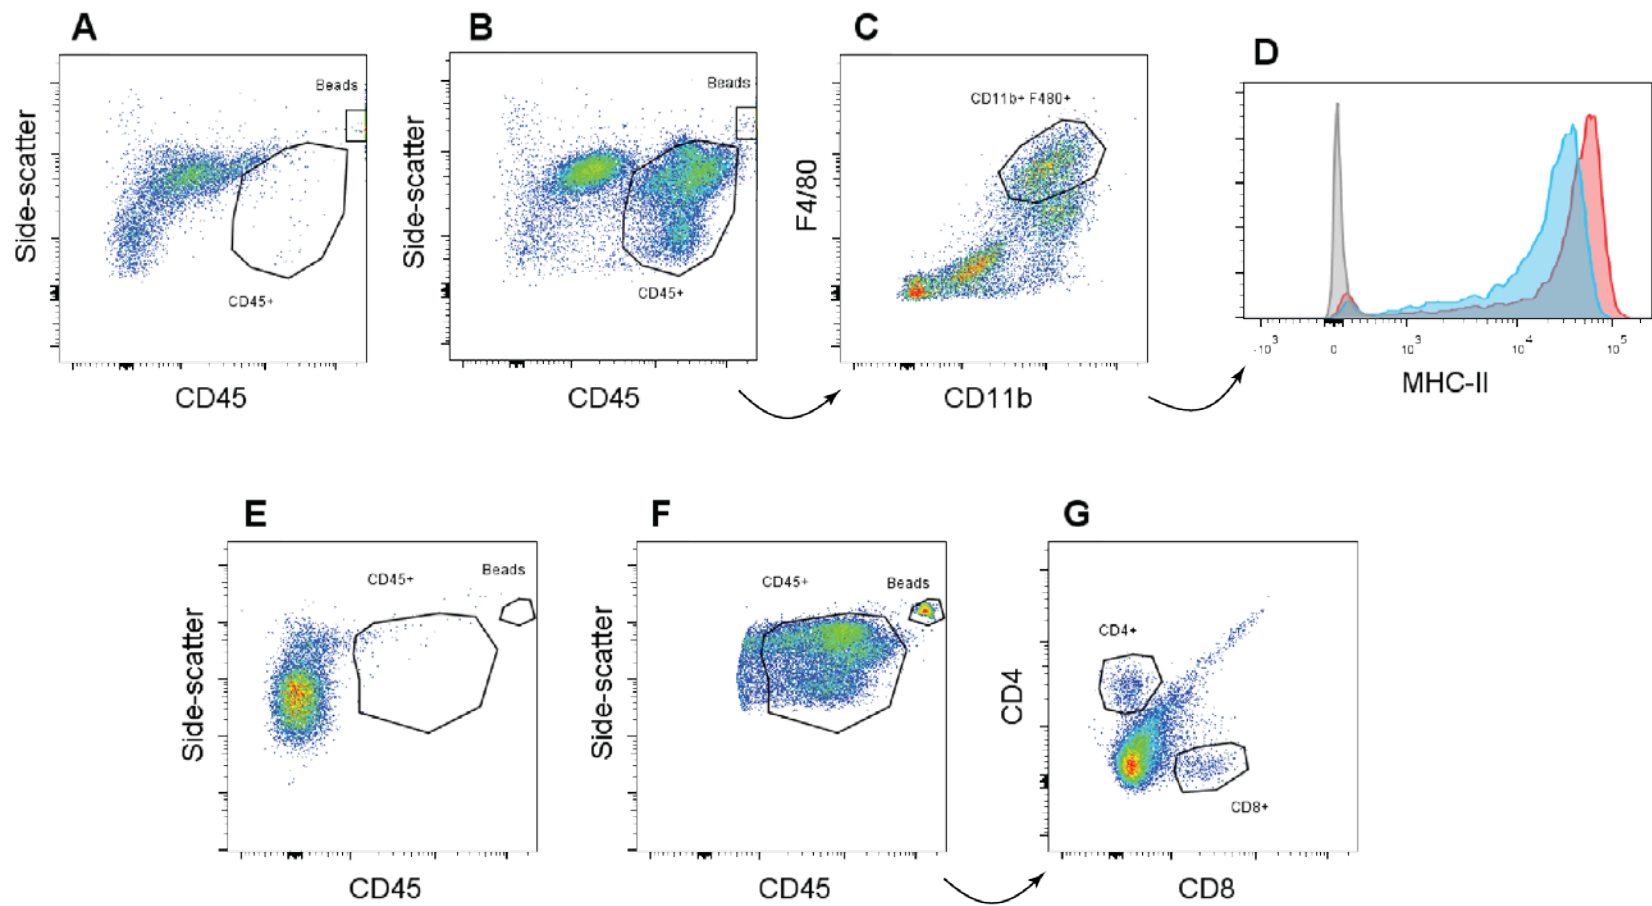

Supplement: pone.0204898.s002.pdf [file pone.0204898.s002.pdf]
