# Supplementary material for: The E3 ubiquitin ligase MARCH1 regulates glucose-tolerance and lipid storage in a sex-specific manner
Source: PubMed Central journal article supplement (PMC6200199; doi:10.1371/journal.pone.0204898), 2018-10-24
Supplement: pone.0204898.s006.pdf [file pone.0204898.s006.pdf]

**S1 Table. Number of subjects in each racial/ethnic group according to study and genotyping platform.**

| Race/ethnicity      | Total (n=9169)                     |                       |                         |                      |                      |                      |
|---------------------|------------------------------------|-----------------------|-------------------------|----------------------|----------------------|----------------------|
|                     | NUgene <sup>a</sup> (n=3357)       |                       |                         |                      | GENEVA (n=5812)      |                      |
|                     | Vanderbilt (n=1951)                |                       | Northwestern (n=1406)   |                      | HPFS (n=2497)        | NHS (n=3315)         |
|                     | <u>660W<sup>b</sup></u><br>(n=597) | <u>1M</u><br>(n=1354) | <u>660W</u><br>(n=1159) | <u>1M</u><br>(n=247) | <u>Affy (n=2497)</u> | <u>Affy (n=3315)</u> |
| White, not Hispanic | <u>139</u>                         | 0                     | <u>1134</u>             | 0                    | <u>2397</u>          | <u>3222</u>          |
| White, Hispanic     | 2                                  | 0                     | 25                      | 0                    | 0                    | 34                   |
| Black, not Hispanic | 0                                  | <u>1354</u>           | 0                       | <u>242</u>           | 25                   | 26                   |
| Black, Hispanic     | 0                                  | 0                     | 0                       | 5                    | 0                    | 2                    |
| American Indian     | 0                                  | 0                     | 0                       | 0                    | 0                    | 14                   |
| Asian               | 0                                  | 0                     | 0                       | 0                    | 25                   | 17                   |
| Other               | 0                                  | 0                     | 0                       | 0                    | 50                   | 0                    |
| Unknown/missing     | 456                                | 0                     | 0                       | 0                    | 0                    | 0                    |

Underlined numbers indicate subjects included in the current analysis

HPFS, Health Professional Follow-up Study; NHS, Nurses' Health Study

<sup>a</sup>Indicates study

<sup>b</sup>Indicates genotyping platform
