# Supplementary material for: The E3 ubiquitin ligase MARCH1 regulates glucose-tolerance and lipid storage in a sex-specific manner
Source: PubMed Central journal article supplement (PMC6200199; doi:10.1371/journal.pone.0204898), 2018-10-24
Supplement: pone.0204898.s007.pdf [file pone.0204898.s007.pdf]

**S2 Table. Groups for preliminary analysis of MARCH1 SNPs and type 2 diabetes, grouped by race/ethnicity and genotyping platform**

|                            | White, not Hispanic (n=6892)                          |           |                               |             |                       |             |                      |              | Black, not Hispanic (n=1596) |            |                            |            |
|----------------------------|-------------------------------------------------------|-----------|-------------------------------|-------------|-----------------------|-------------|----------------------|--------------|------------------------------|------------|----------------------------|------------|
|                            | Vanderbilt <sup>a</sup> /660W <sup>b</sup><br>(n=139) |           | Northwestern/660W<br>(n=1134) |             | HPFS/Affy<br>(n=2397) |             | NHS/Affy<br>(n=3222) |              | Vanderbilt/1M<br>(n=1354)    |            | Northwestern/1M<br>(n=242) |            |
|                            | Cases                                                 | Controls  | Cases                         | Controls    | Cases                 | Controls    | Cases                | Controls     | Cases                        | Controls   | Cases                      | Controls   |
| Cases (%)                  | <b>99 (71.2)</b>                                      | <b>40</b> | <b>530 (46.7)</b>             | <b>604</b>  | <b>1116 (46.6)</b>    | <b>1281</b> | <b>1466 (45.5)</b>   | <b>1756</b>  | <b>598 (44.2)</b>            | <b>756</b> | <b>153 (63.2)</b>          | <b>89</b>  |
| Females (%)                | 45 (45.5)                                             | 22 (55.0) | 233 (44.0)                    | 337 (55.8)  | 0 (0.0)               | 0 (0.0)     | 1466 (100.0)         | 1756 (100.0) | 373 (62.4)                   | 501 (66.3) | 97 (63.4)                  | 68 (76.4)  |
| Family history of diabetes |                                                       |           |                               |             |                       |             |                      |              |                              |            |                            |            |
| No (%)                     | 47 (47.5)                                             | 28 (70.0) | 0                             | 0           | 635 (56.9)            | 1009 (78.8) | 741 (50.5)           | 1370 (78.0)  | 128 (21.4)                   | 479 (63.4) | 0                          | 0          |
| Yes (%)                    | 48 (48.5)                                             | 5 (12.5)  | 460 (86.8)                    | 0           | 481 (43.1)            | 272 (21.2)  | 725 (49.5)           | 386 (22.0)   | 456 (76.3)                   | 204 (27.0) | 143 (93.5)                 | 0          |
| Unknown/missing (%)        | 4 (4.0)                                               | 7 (17.5)  | 70 (13.2)                     | 604 (100.0) | 0                     | 0           | 0                    | 0            | 14 (2.3)                     | 73 (9.7)   | 10 (6.5)                   | 89 (100.0) |

HPFS, Health Professional Follow-up Study; NHS, Nurses' Health Study

<sup>a</sup>Indicates study

<sup>b</sup>Indicates genotyping platform
